# Supplementary material for: Cytosolic Ptbp2 modulates axon growth in motoneurons through axonal localization and translation of Hnrnpr
Source: PubMed Central journal article supplement (PMC10338680; doi:10.1038/s41467-023-39787-6), 2023-07-12
Supplement: 41467_2023_39787_MOESM3_ESM.pdf [file 41467_2023_39787_MOESM3_ESM.pdf]

## **Description of Additional Supplementary Files**

File Name: Supplementary Data 1

Description: List of proteins identified by mass spectrometry following pulldown with the Hnrnp  
3' UTR.

File Name: Supplementary Data 2

Description: Primer sequences for RT-qPCR.

File Name: Supplementary Data 3

Description: List of primary and secondary antibodies.
